# Supplementary material for: A tetra Co(ii/iii) complex with an open cubane Co4O4 core and square-pyramidal Co(ii) and octahedral Co(iii) centres: bifunctional electrocatalytic activity towards water splitting at neutral pH
Source: Royal Society of Chemistry journal article supplement (doi:10.1039/d1dt04086c), 2022-01-01
Supplement: d1dt04086c1.pdf [file d1dt04086c1.pdf]

## Supplementary Information

A tetraCo(II/III) complex with an open cubane Co<sub>4</sub>O<sub>4</sub> core and square-pyramidal Co(II) and octahedral Co(III) centres: bifunctional electrocatalytic activity towards water splitting at neutral pH

Ankit Kumar Srivastava,<sup>a</sup> Arpan Mondal,<sup>b</sup> Sanjit Konar<sup>b</sup> and Samudranil Pal<sup>\*a</sup>

<sup>a</sup> *School of Chemistry, University of Hyderabad, Hyderabad 500046, India*

<sup>b</sup> *Department of Chemistry, Indian Institute of Science Education and Research Bhopal, Bhopal 462066, India*

\*Corresponding author

*E-mail: spal@uohyd.ac.in*

## Section S1

### Quantitative Estimation of Electrocatalytically Produced Hydrogen/Oxygen

The quantitative estimation of the evolved gas was performed by constant current electrolysis (CCE) with a locally designed and constructed electrolysis cell, where the working electrode and the counter electrode were placed in two separate chambers (image on the left). Bulk electrolysis at a constant current of  $-500 \mu\text{A}$  (for HER) or  $500 \mu\text{A}$  (for OER) was carried out for 6 h using the two electrode system and 0.1 M sodium phosphate buffer of pH 7 as the

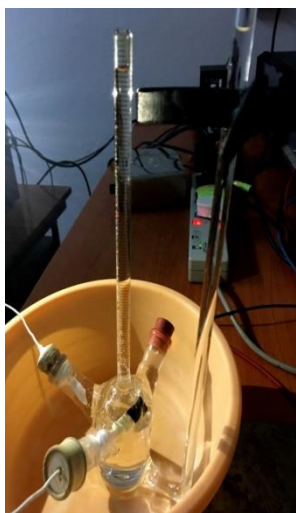

electrolyte. Surface coated (with  $[\text{Co}^{\text{II}}\text{Co}^{\text{III}}(\mu\text{-OAc})(\mu_3\text{-OH})(\mu\text{-L})_2]$ , carbon-black and Nafion) FTO electrode with surface area of  $0.5 \text{ cm}^2$  was used as the working electrode (cathode for HER/anode for OER) and a spiral platinum wire was used as the counter electrode (anode for HER/cathode for OER). The loading of the catalyst on FTO was maintained at  $0.6 \text{ mg/cm}^2$ . During electrolysis gas bubbles were formed at the surface coated FTO electrode which steadily accumulated in the graduated tube by displacing the electrolyte solution. The cell was designed in such a way that the gas bubbles formed at the counter electrode could no way interfere with those formed at the working electrode.

## Section S2

**Theoretical Calculations to Determine the Magnetic Anisotropy.** The ab initio calculations were performed using the coordinates obtained from X-ray crystal structure without optimization. The diamagnetic Co(III) atoms were replaced by Ga(III) atoms in all the calculations. In these calculations, ZORA (zeroth-order regular approximation) was employed for both first principles and ZFS calculations. The basis sets def2-TZVPP for Co, def2-TZVP for Ga, def2-TZVP for N and O, and def2-SV(P) for C and H with the auxiliary basis set def2/JK for all the atoms were used for all calculations. Using the configuration interaction (CI) procedure, 10 quartet and 40 doublet spin states with the active space containing 7 electrons distributed over 5 d-orbitals (CAS 7, 5) were computed. In addition, to introduce the effect of dynamic correlation N-electron valence perturbation theory (NEVPT2) was employed on top of the CASSCF wave function. Further, the spin-orbit coupling was included by using quasi-degenerate perturbation theory (QDPT) approach. Both second-order perturbation theory and an effective Hamiltonian approach (EHA) were used to calculate the ZFS parameters  $D$  and  $E$ .

The SH parameters obtained from fitting of experimental data and ab initio calculations

| Complex                                                                                          | $D_{\text{exp}}$<br>( $\text{cm}^{-1}$ ) | $ E _{\text{exp}}$<br>( $\text{cm}^{-1}$ ) | $g_{\text{exp}}$ | $D_{\text{theo}}$<br>( $\text{cm}^{-1}$ ) | $ E _{\text{theo}}$<br>( $\text{cm}^{-1}$ ) | $g_{\text{theo}}$ |
|--------------------------------------------------------------------------------------------------|------------------------------------------|--------------------------------------------|------------------|-------------------------------------------|---------------------------------------------|-------------------|
| $[\text{Co}^{\text{II}}\text{Co}^{\text{III}}(\mu\text{-OAc})(\mu_3\text{-OH})(\mu\text{-L})_2]$ | -23.59                                   | 0.03                                       | 2.52             | -67.34                                    | 0.30                                        | 2.47              |

## Section S3

### Calculations of the Faradaic Efficiencies for HER and OER using Complex, CB, and Nafion Mixture Coated FTO Electrode

**Hydrogen Evolution Reaction (HER).** In the CCE experiment (see Section S1 for the procedure and the electrolytic cell setup) for HER, it was found that 1.4 mL of hydrogen was evolved at ambient temperature and pressure in 6 h. Therefore, the number of moles of hydrogen evolved in 1 h =  $1.4/(6 \times 22400)$  mol =  $10.41 \times 10^{-6}$  mol.

The controlled experiment was performed using carbon-black and Nafion coated FTO electrode keeping all other experimental conditions identical. The total amount of hydrogen evolved in 6 h was ~0.22 mL. Therefore, in terms of number of moles, the amount of hydrogen evolved in 1 h =  $0.22/(6 \times 22400)$  mol =  $1.63 \times 10^{-6}$  mol.

$$\begin{aligned} \text{Thus, the amount of hydrogen actually evolved in 1 h} &= (10.41 - 1.63) \times 10^{-6} \text{ mol} \\ &= 8.78 \times 10^{-6} \text{ mol} \end{aligned}$$

The ideal number of moles of hydrogen expected to be evolved is  $Q/nF$ , where  $Q$  is the total charge employed,  $n$  is the number of electrons involved for  $H_2$  production and  $F$  is the Faraday constant. The value of  $n$  for HER is 2 as it is a two electron process and since we employed  $-500 \mu\text{A}$  current,  $Q/nF$  in 1 h =  $(0.5 \times 10^{-3} \times 3600)/(2 \times 96500)$  =  $9.33 \times 10^{-6}$  mol.

The expression used for the calculation of Faradaic Efficiency is as follows:

$$\begin{aligned} \text{Faradaic Efficiency} &= \frac{\text{Moles of hydrogen evolved experimentally in 1 h}}{\text{Moles of hydrogen ideally expected in 1 h}} \times 100 \\ &= \{(8.78 \times 10^{-6})/(9.33 \times 10^{-6})\} \times 100 = 94\% \end{aligned}$$

**Oxygen Evolution Reaction (OER).** In the CCE experiment (see Section S1 for the procedure and the electrolytic cell setup) for OER, 0.53 mL of oxygen was evolved at ambient temperature and pressure in 6 h. Therefore, the number of moles of oxygen evolved in 1 h =  $0.53/(6 \times 22400)$  mol =  $3.94 \times 10^{-6}$  mol.

In the controlled experiment performed using carbon-black and Nafion coated FTO electrode keeping all other experimental conditions identical the amount of oxygen evolved in 6 h was ~0.04 mL. Hence, the number of moles oxygen evolved in 1 h =  $0.04/(6 \times 22400)$  mol =  $0.3 \times 10^{-6}$  mol.

$$\begin{aligned} \text{Hence, the amount of oxygen actually evolved} &= (3.94 - 0.3) \times 10^{-6} \text{ mol} \\ &= 3.64 \times 10^{-6} \text{ mol} \end{aligned}$$

The ideal number of moles of oxygen expected to be evolved is  $Q/nF$ , where  $Q$  is the total charge employed,  $n$  is the number of electrons involved for  $O_2$  production and  $F$  is the Faraday constant. The value of  $n$  for OER is 4 as it is a four electron process and since we employed  $500 \mu\text{A}$  current,  $Q/nF$  in 1 h =  $(0.5 \times 10^{-3} \times 3600)/(4 \times 96500)$  =  $4.66 \times 10^{-6}$  mol.

The expression used for the calculation of the Faradaic Efficiency is as follows:

$$\begin{aligned} \text{Faradaic Efficiency} &= \frac{\text{Moles of oxygen evolved experimentally in 1 h}}{\text{Moles of oxygen ideally expected in 1 h}} \times 100 \\ &= \{(3.64 \times 10^{-6}) / (4.66 \times 10^{-6})\} \times 100 = 78\% \end{aligned}$$

## Section S4

### Calculations of Turnover Frequencies (TOF) for HER and OER using Complex, CB, and Nafion Mixture Coated FTO Electrode

**Hydrogen Evolution Reaction (HER).** The TOF was calculated using the following equation:  $\text{TOF} = I/2mF$ , where,  $I$  ( $= 2.55 \times 10^{-4}$  A) is the steady state current in the constant potential ( $-1.05$  V) electrolysis (CPE) plot for HER (Fig. S8),  $F$  is the Faraday constant (in  $\text{C mol}^{-1}$ ),  $m$  is the number of active sites (in mol), and 2 is the number of electrons required to form one hydrogen molecule from two protons.

The number of active sites  $m$  can be calculated using the equation,  $m = Q/2F$ , where,  $Q$  ( $1.96 \times 10^{-4}$  C) is the charge calculated by integrating the current vs time plot (within the potential range  $-0.8$  to  $-1.2$  V) generated from the cyclic voltammogram trace (in Fig. 6 and also in Fig. S4) recorded using  $[\text{Co}^{\text{II}}\text{Co}^{\text{III}}(\mu\text{-OAc})(\mu_3\text{-OH})(\mu\text{-L})_2]$ , carbon-black, and Nafion coated FTO as the working electrode under non-catalytic conditions (THF medium rather than the neutral sodium phosphate buffer medium) and the factor  $\frac{1}{2}$  is for the 2 electron reduction of the catalyst  $[\text{Co}^{\text{II}}\text{Co}^{\text{III}}(\mu\text{-OAc})(\mu_3\text{-OH})(\mu\text{-L})_2]$ . Now, replacing  $m$  by  $Q/2F$  in the equation for TOF (in  $\text{h}^{-1}$ ) we get:

$$\begin{aligned}\text{TOF (in h}^{-1}\text{)} &= (I/2mF) \times 3600 = (I/Q) \times 3600 \\ &= \{(2.55 \times 10^{-4})/(1.96 \times 10^{-4})\} \times 3600 \\ &= 4683 = 4.6 \times 10^3\end{aligned}$$

**Oxygen Evolution Reaction (OER).** Here, the equation used for the calculation of TOF was  $\text{TOF} = I/4mF$ , where,  $I$  ( $= 2.4 \times 10^{-5}$  A) is the steady state current in the constant potential ( $1.05$  V) electrolysis (CPE) plot for OER (Fig. S8),  $F$  is the Faraday constant (in  $\text{C mol}^{-1}$ ),  $m$  is the number of active sites (in mol), and 4 is the number of electrons required to form one oxygen molecule from two water molecules.

The number of active sites  $m$  was calculated using the equation,  $m = Q/2F$ , where,  $Q$  ( $3.97 \times 10^{-5}$  C) is the charge calculated by integrating the current vs time plot (within the potential range  $0.5$  to  $1.1$  V) generated from the cyclic voltammogram trace (in Fig. 7 and also in Fig. S5) recorded using  $[\text{Co}^{\text{II}}\text{Co}^{\text{III}}(\mu\text{-OAc})(\mu_3\text{-OH})(\mu\text{-L})_2]$ , carbon-black, and Nafion coated FTO as the working electrode under non-catalytic conditions (THF medium rather than the neutral sodium phosphate buffer medium) and the factor  $\frac{1}{2}$  is for the 2 electron oxidation of the catalyst  $[\text{Co}^{\text{II}}\text{Co}^{\text{III}}(\mu\text{-OAc})(\mu_3\text{-OH})(\mu\text{-L})_2]$ . Now, replacing  $m$  by  $Q/2F$  in the equation for TOF (in  $\text{h}^{-1}$ ) we get:

$$\begin{aligned}\text{TOF (in h}^{-1}\text{)} &= (I/4mF) \times 3600 = (I/2Q) \times 3600 \\ &= \{(2.4 \times 10^{-5})/(2 \times 3.97 \times 10^{-5})\} \times 3600 \\ &= 1088 = 1.1 \times 10^3\end{aligned}$$

## Section S5

### Calculations of the Faradaic Efficiency and Turnover Frequency (TOF) for OER using Pure Complex Coated FTO Electrode

**Faradaic Efficiency.** In the CCE experiment (see Section 1 and main text for the procedure and the electrolytic cell setup) for OER, 0.51 mL of oxygen was evolved at ambient temperature and pressure in 6 h. Therefore, the number of moles of oxygen evolved in 1 h =  $0.51/(6 \times 22400) \text{ mol} = 3.8 \times 10^{-6} \text{ mol}$ .

In the controlled experiment performed using pristine FTO electrode keeping all other experimental conditions identical, the amount of oxygen evolved in 6 h was ~0.05 mL. Hence, the number of moles oxygen evolved in 1 h =  $0.05/(6 \times 22400) \text{ mol} = 0.4 \times 10^{-6} \text{ mol}$ .

$$\begin{aligned} \text{Hence, the amount of oxygen actually evolved} &= (3.8 - 0.4) \times 10^{-6} \text{ mol} \\ &= 3.4 \times 10^{-6} \text{ mol} \end{aligned}$$

The ideal number of moles of oxygen expected to be evolved is  $Q/nF$ , where  $Q$  is the total charge employed,  $n$  is the number of electrons involved for  $\text{O}_2$  production and  $F$  is the Faraday constant. The value of  $n$  for OER is 4 as it is a four electron process and since we employed 500  $\mu\text{A}$  current,  $Q/nF$  in 1 h =  $(0.5 \times 10^{-3} \times 3600)/(4 \times 96500) = 4.66 \times 10^{-6} \text{ mol}$ .

$$\begin{aligned} \text{Faradaic Efficiency} &= \frac{\text{Moles of oxygen evolved experimentally in 1 h}}{\text{Moles of oxygen ideally expected in 1 h}} \times 100 \\ &= \{(3.4 \times 10^{-6}) / (4.66 \times 10^{-6})\} \times 100 = 73\% \end{aligned}$$

**Turnover Frequency.** Here, the equation used for the calculation of TOF was  $\text{TOF} = I/4mF$ , where,  $I$  ( $= 6.8 \times 10^{-5} \text{ A}$ ) is the steady state current in the constant potential (1.28 V) electrolysis (CPE) plot for OER (Fig. S12),  $F$  is the Faraday constant (in  $\text{C mol}^{-1}$ ),  $m$  is the number of active sites (in mol), and 4 is the number of electrons required to form one oxygen molecule from two water molecules.

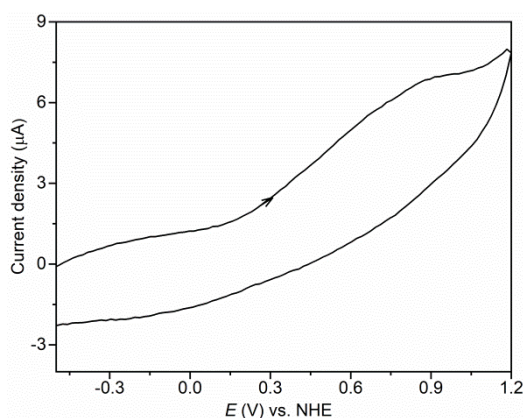

The number of active sites  $m$  was calculated using the equation,  $m = Q/2F$ , where,  $Q$  ( $3.6 \times 10^{-5} \text{ C}$ ) is the charge calculated by integrating the current vs time plot (within the potential range 0.5 to 1.1 V) generated from the cyclic voltammogram trace (shown at the left) recorded using only  $[\text{Co}^{\text{II}}\text{Co}^{\text{III}}(\mu\text{-OAc})(\mu_3\text{-OH})(\mu\text{-L})_2]$  coated FTO as the working electrode under non-catalytic conditions (THF medium rather than the neutral sodium phosphate buffer medium) and the factor  $1/2$  is for the 2 electron oxidation of the catalyst  $[\text{Co}^{\text{II}}\text{Co}^{\text{III}}(\mu\text{-OAc})(\mu_3\text{-OH})(\mu\text{-L})_2]$ . Now, replacing  $m$  by  $Q/2F$  for  $m$  in the equation for TOF (in  $\text{h}^{-1}$ ) we get:

$$\begin{aligned} \text{TOF (in h}^{-1}\text{)} &= (I/4mF) \times 3600 = (I/2Q) \times 3600 \\ &= \{(6.8 \times 10^{-5}) / (2 \times 3.6 \times 10^{-5})\} \times 3600 \\ &= 3400 = 3.4 \times 10^3 \end{aligned}$$

## Section S6

### Calculations of the Faradaic Efficiency and the Turnover Frequency (TOF) for HER using Pure Complex Coated FTO Electrode

In the CCE experiment (see Section S1 and main text for the procedure and the electrolytic cell setup) for HER, it was found that 1.33 mL of hydrogen was evolved at ambient temperature and pressure in 6 h. Therefore, the number of moles of hydrogen evolved in 1 h =  $1.33/(6 \times 22400)$  mol =  $9.89 \times 10^{-6}$  mol.

The controlled experiment was performed using pristine FTO electrode keeping all other experimental conditions identical. The total amount of hydrogen evolved in 6 h was ~0.20 mL. Therefore, in terms of number of moles, the amount of hydrogen evolved in 1 h =  $0.20/(6 \times 22400)$  mol =  $1.48 \times 10^{-6}$  mol.

$$\begin{aligned} \text{Thus, the amount of hydrogen actually evolved in 1 h} &= (9.89 - 1.48) \times 10^{-6} \text{ mol} \\ &= 8.41 \times 10^{-6} \text{ mol} \end{aligned}$$

The ideal number of moles of hydrogen expected to be evolved is  $Q/nF$ , where  $Q$  is the total charge employed,  $n$  is the number of electrons involved for  $H_2$  production and  $F$  is the Faraday constant. The value of  $n$  for HER is 2 as it is a two electron process and since we employed  $-500 \mu\text{A}$  current,  $Q/nF$  in 1 h =  $(0.5 \times 10^{-3} \times 3600)/(2 \times 96500)$  =  $9.33 \times 10^{-6}$  mol.

The expression used for the calculation of Faradaic Efficiency is as follows:

$$\begin{aligned} \text{Faradaic Efficiency} &= \frac{\text{Moles of hydrogen evolved experimentally in 1 h}}{\text{Moles of hydrogen ideally expected in 1 h}} \times 100 \\ &= \{(8.41 \times 10^{-6})/(9.33 \times 10^{-6})\} \times 100 = 90\% \end{aligned}$$

### Hydrogen Evolution Reaction (HER).

The TOF was calculated using the following equation:  $\text{TOF} = I/2mF$ , where,  $I$  ( $= 7.57 \times 10^{-4}$  A) is the steady state current in the constant potential ( $-1.28$  V) electrolysis (CPE) plot for HER (Fig. S12),  $F$  is the Faraday constant (in  $\text{C mol}^{-1}$ ),  $m$  is the number of active sites (in mol), and 2 is the number of electrons required to form one hydrogen molecule from two protons. The number of active sites  $m$  can be calculated using the equation,  $m = Q/2F$ , where,  $Q$  ( $1.77 \times 10^{-4}$  C) is the charge calculated by integrating the current vs time plot (within the potential range  $-0.8$  to  $-1.2$  V) generated from the cyclic voltammogram trace (shown at the left) recorded using

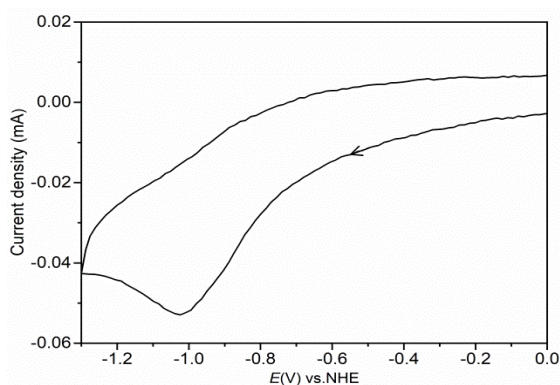

$[\text{Co}^{\text{II}}\text{Co}^{\text{III}}(\mu\text{-OAc})(\mu_3\text{-OH})(\mu\text{-L})_2]$  coated FTO as the working electrode under non-catalytic conditions (THF medium rather than the neutral sodium phosphate buffer medium) and the factor  $\frac{1}{2}$  is for the 2 electron reduction of the catalyst  $[\text{Co}^{\text{II}}\text{Co}^{\text{III}}(\mu\text{-OAc})(\mu_3\text{-OH})(\mu\text{-L})_2]$ . Now, replacing  $m$  by  $Q/2F$  in the equation for TOF (in  $\text{h}^{-1}$ ) we get:

$$\begin{aligned} \text{TOF (in h}^{-1}\text{)} &= (I/2mF) \times 3600 = (I/Q) \times 3600 \\ &= \{(7.57 \times 10^{-4})/(1.77 \times 10^{-4})\} \times 3600 \\ &= 15396 = 1.53 \times 10^4 \end{aligned}$$

**Table S1**Continuous shape measurement for Co-centers in  $[\text{Co}^{\text{II}}\text{Co}^{\text{III}}(\mu\text{-OAc})(\mu_3\text{-OH})(\mu\text{-L})_2]$ .

| <b>Metal atom</b> | <b>S. No.</b> | <b>Geometry</b>                                      | <b>Symmetry</b>       | <b>CShM value</b> |
|-------------------|---------------|------------------------------------------------------|-----------------------|-------------------|
| Co1               | 1             | Hexagon                                              | D <sub>6h</sub>       | 30.776            |
|                   | 2             | Pentagonal pyramid                                   | C <sub>5v</sub>       | 27.439            |
|                   | <b>3</b>      | <b>Octahedron</b>                                    | <b>Oh</b>             | <b>0.426</b>      |
|                   | 4             | Trigonal prism                                       | D <sub>3h</sub>       | 14.389            |
|                   | 5             | Johnson pentagonal pyramid J2                        | C <sub>5v</sub>       | 31.198            |
| Co2               | 1             | Pentagon                                             | D <sub>5h</sub>       | 26.788            |
|                   | <b>2</b>      | <b>Vacant octahedron (Johnson square pyramid J1)</b> | <b>C<sub>4v</sub></b> | <b>1.791</b>      |
|                   | 3             | Trigonal bipyramid                                   | D <sub>3h</sub>       | 6.025             |
|                   | 4             | Spherical square pyramid                             | C <sub>4v</sub>       | 1.831             |
|                   | 5             | Johnson trigonal bipyramid J12                       | D <sub>3h</sub>       | 8.109             |
| Co3               | 1             | Hexagon                                              | D <sub>6h</sub>       | 30.679            |
|                   | 2             | Pentagonal pyramid                                   | C <sub>5v</sub>       | 25.914            |
|                   | <b>3</b>      | <b>Octahedron</b>                                    | <b>Oh</b>             | <b>0.626</b>      |
|                   | 4             | Trigonal prism                                       | D <sub>3h</sub>       | 12.916            |
|                   | 5             | Johnson pentagonal pyramid J2                        | C <sub>5v</sub>       | 29.769            |
| Co4               | 1             | Pentagon                                             | D <sub>5h</sub>       | 25.170            |
|                   | 2             | Vacant octahedron (Johnson square pyramid J1)        | C <sub>4v</sub>       | 1.971             |
|                   | 3             | Trigonal bipyramid                                   | D <sub>3h</sub>       | 7.114             |
|                   | <b>4</b>      | <b>Spherical square pyramid</b>                      | <b>C<sub>4v</sub></b> | <b>1.864</b>      |
|                   | 5             | Johnson trigonal bipyramid J12                       | D <sub>3h</sub>       | 9.215             |

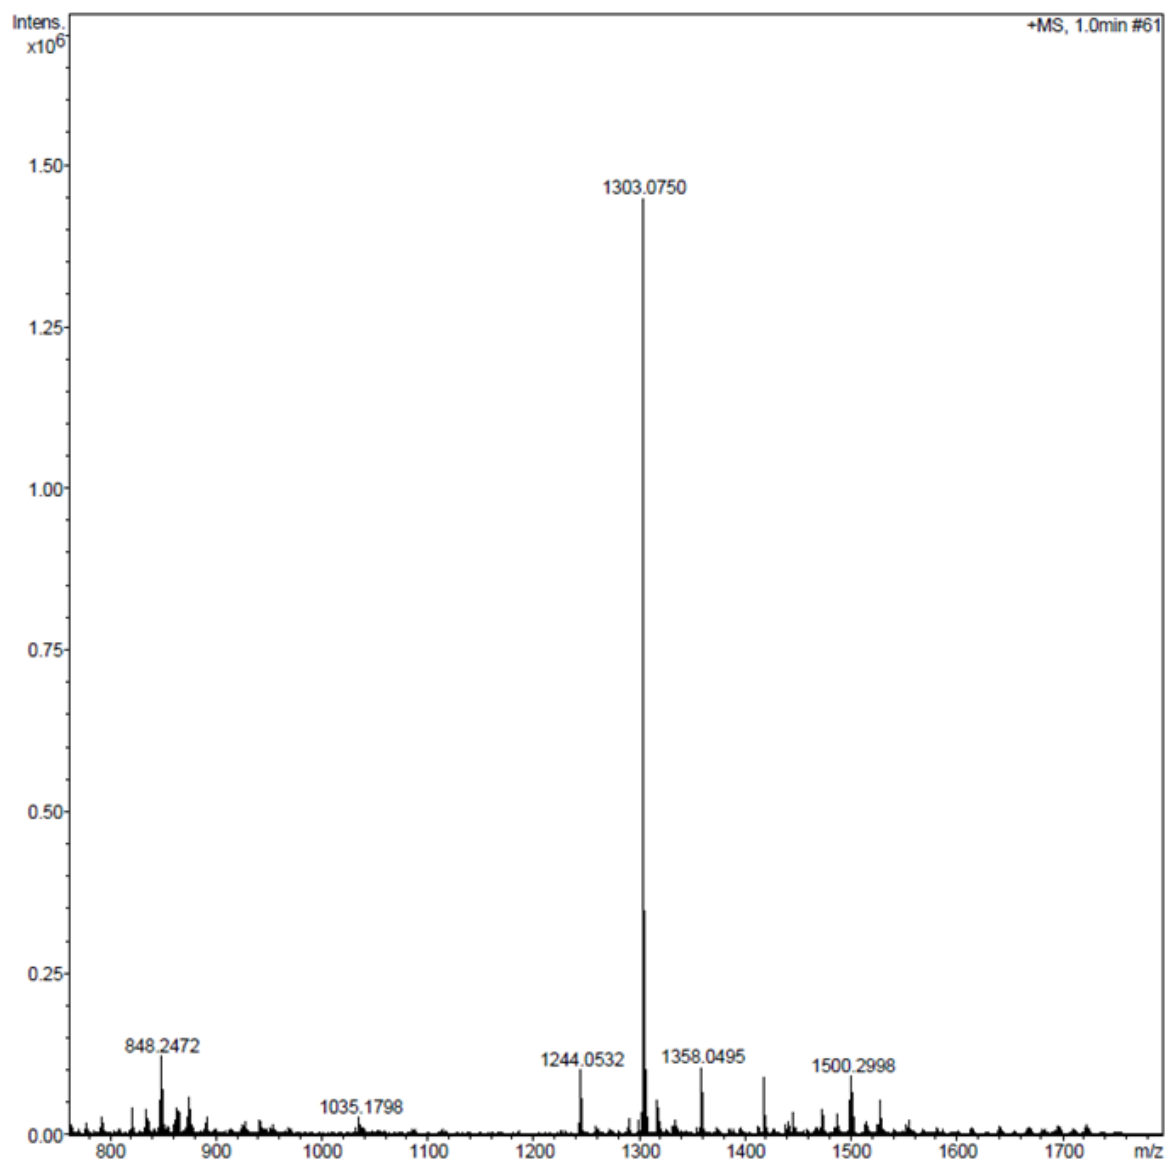

**Fig. S1** ESI mass spectrum of  $[\text{Co}^{\text{II}}\text{Co}^{\text{III}}(\mu\text{-OAc})(\mu_3\text{-OH})(\mu\text{-L})_2]$  in *N,N*-dimethylformamide.



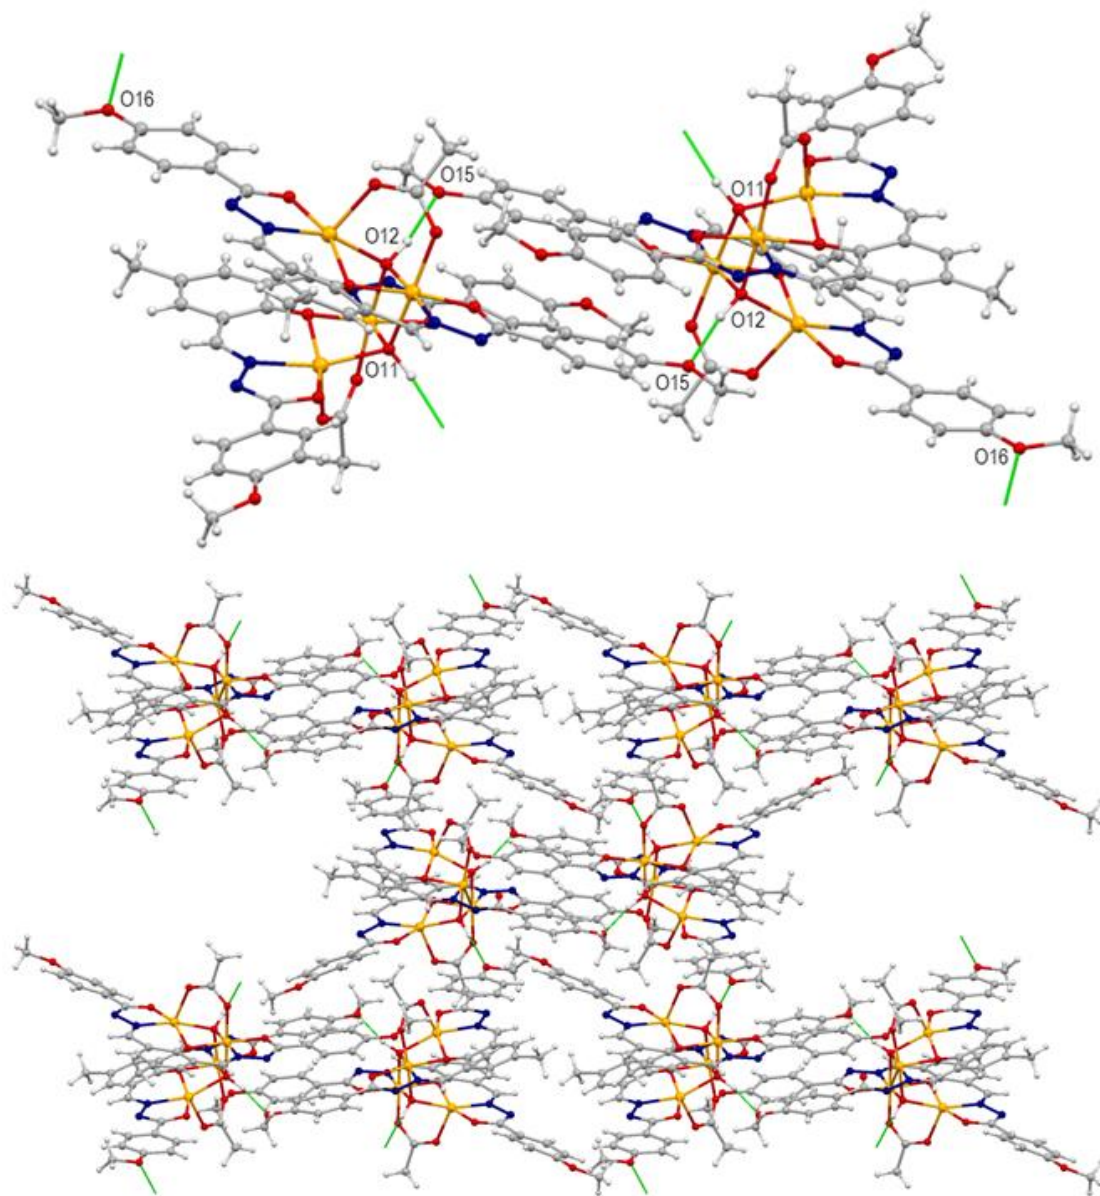

**Fig. S2** Hydrogen bonded dimer of  $[\text{Co}^{\text{II}}\text{Co}^{\text{III}}(\mu\text{-OAc})(\mu_3\text{-OH})(\mu\text{-L})_2]$  (top) and the two-dimensional assembly of these dimeric units viewed along the *a*-axis (bottom).

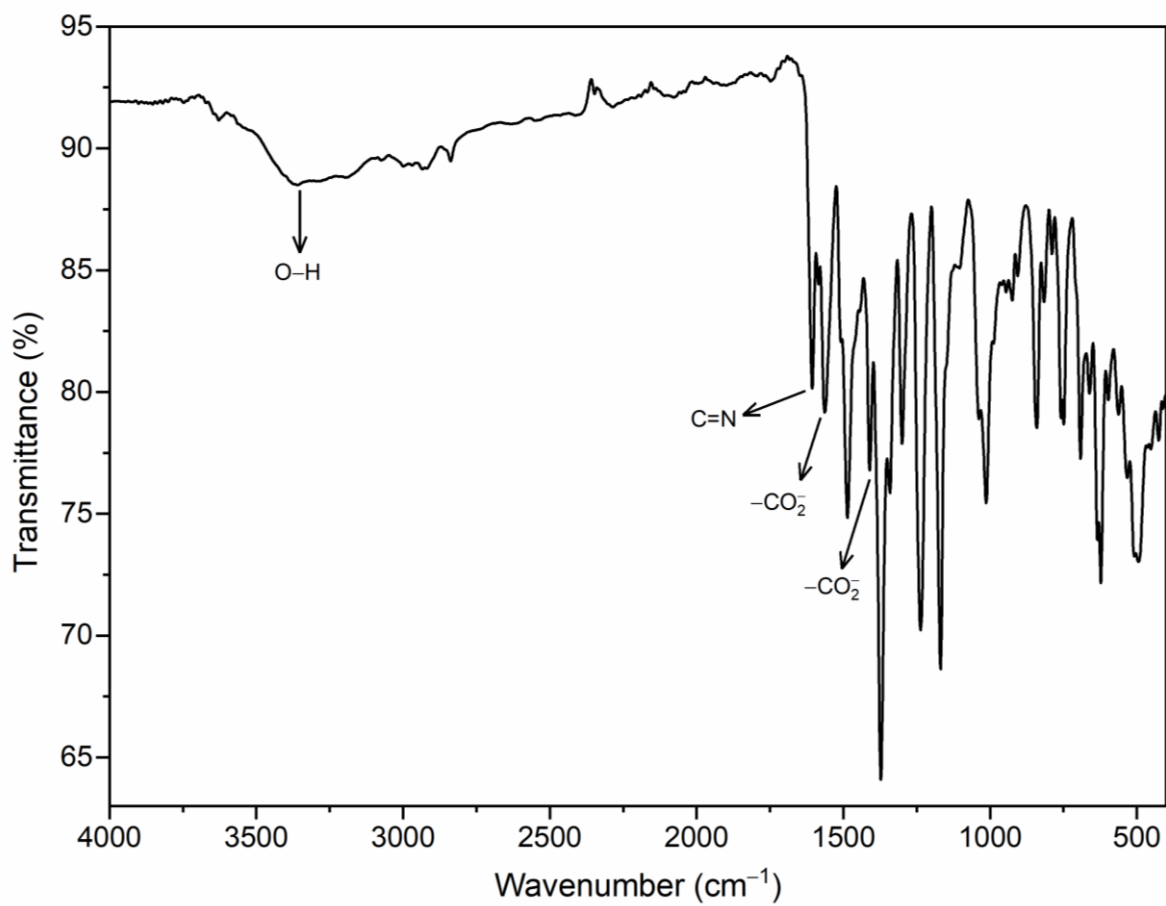

**Fig. S3** Infrared spectrum of  $[\text{Co}^{\text{II}}\text{Co}^{\text{III}}(\mu\text{-OAc})(\mu_3\text{-OH})(\mu\text{-L})]_2$  in powder phase.

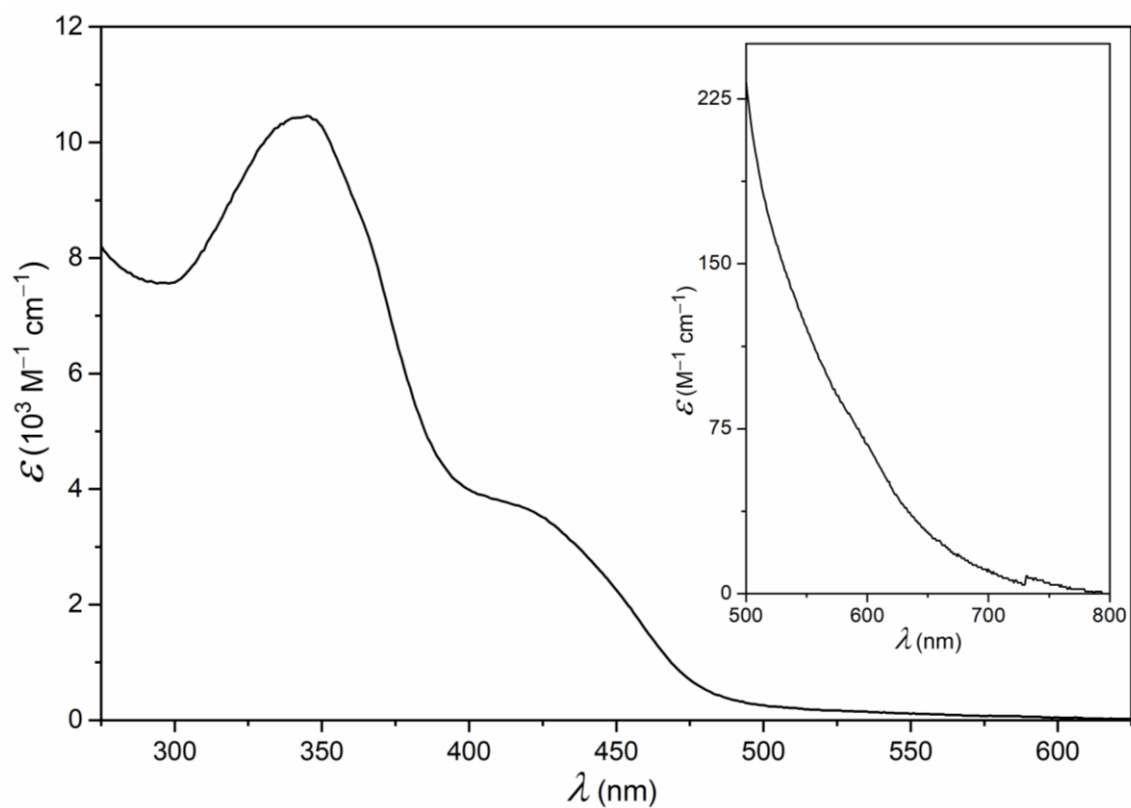

**Fig. S4** Electronic spectrum of  $[\text{Co}^{\text{II}}\text{Co}^{\text{III}}(\mu\text{-OAc})(\mu_3\text{-OH})(\mu\text{-L})]_2$  in *N,N*-dimethylformamide. Inset: Enlarged low-energy portion.

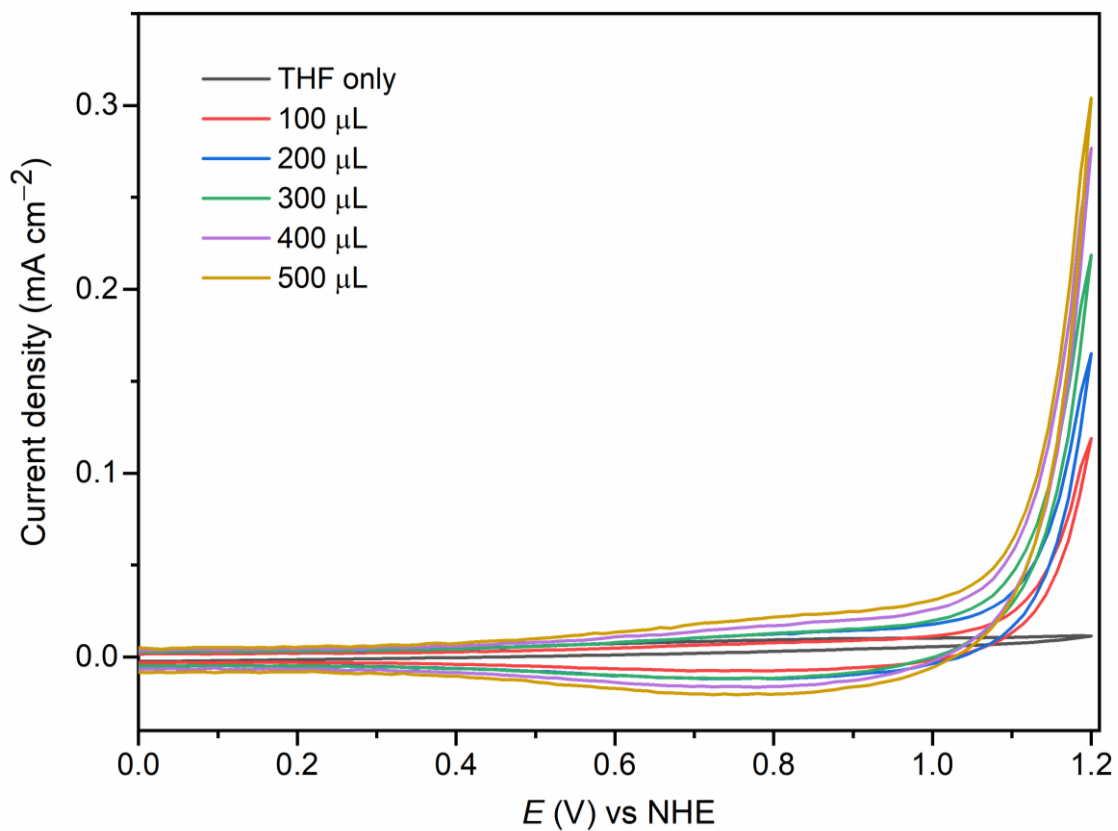

**Fig. S5** Electrocatalytic water oxidation in tetrahydrofuran (THF) with gradual addition of aliquots of sodium phosphate buffer of pH 7.

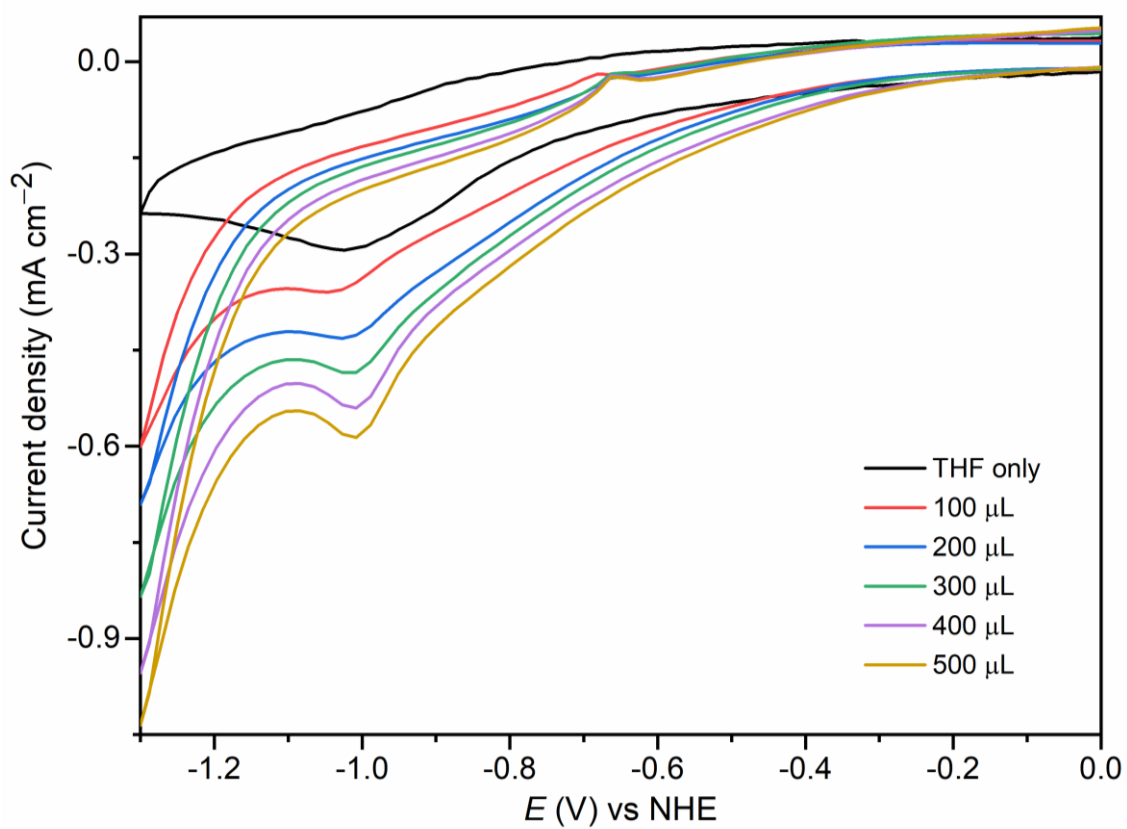

**Fig. S6** Electrocatalytic water reduction in tetrahydrofuran (THF) with incremental addition of sodium phosphate buffer of pH 7.

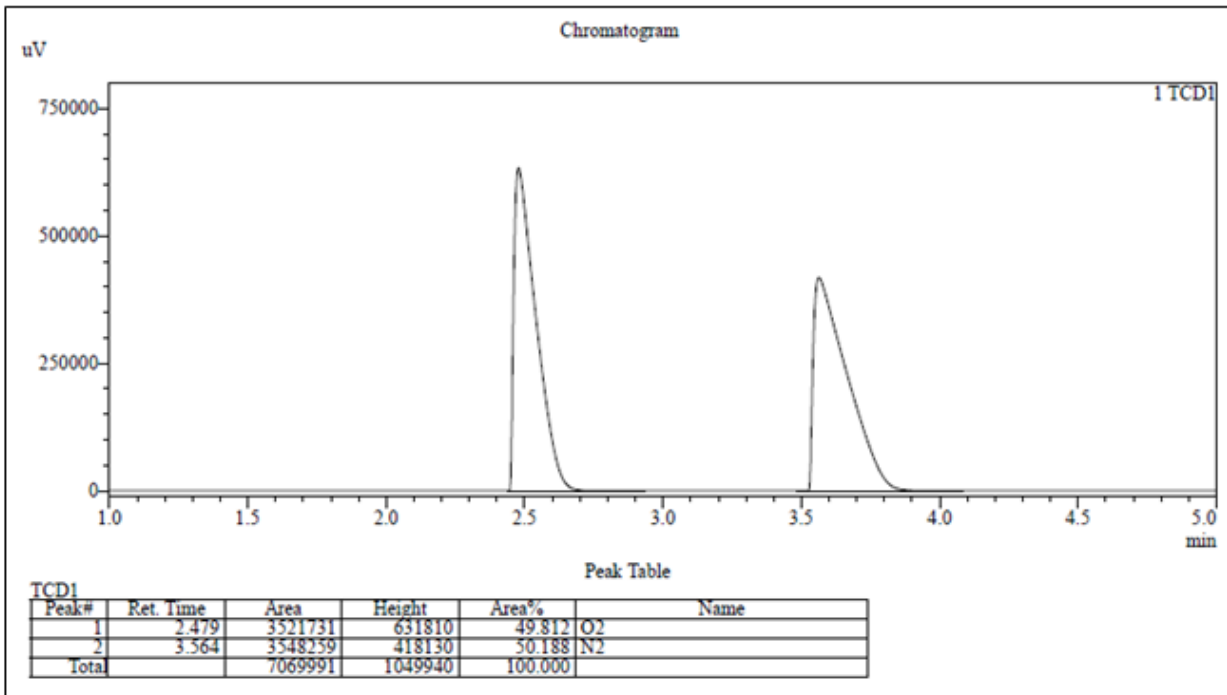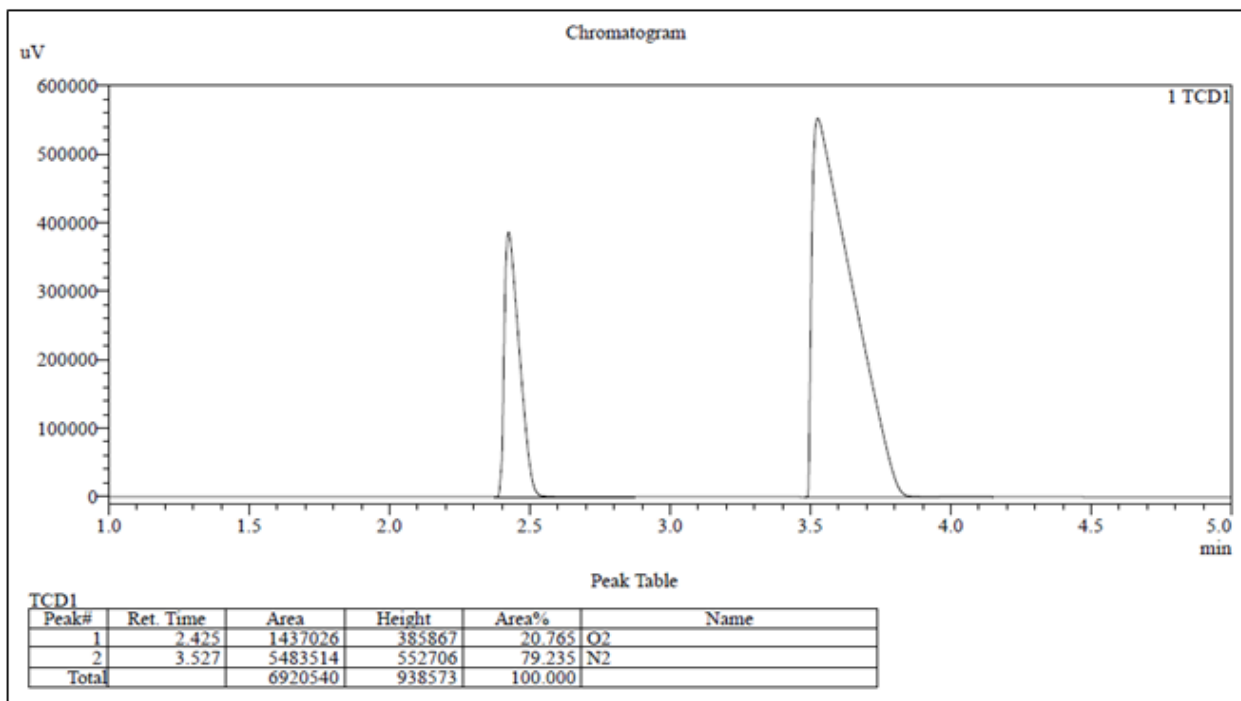

**Fig. S7** Chromatograms of the gas evolved in the oxidative electrolysis (top) and air (bottom). The nitrogen peak in the first chromatogram is due to contamination by air during sample collection.

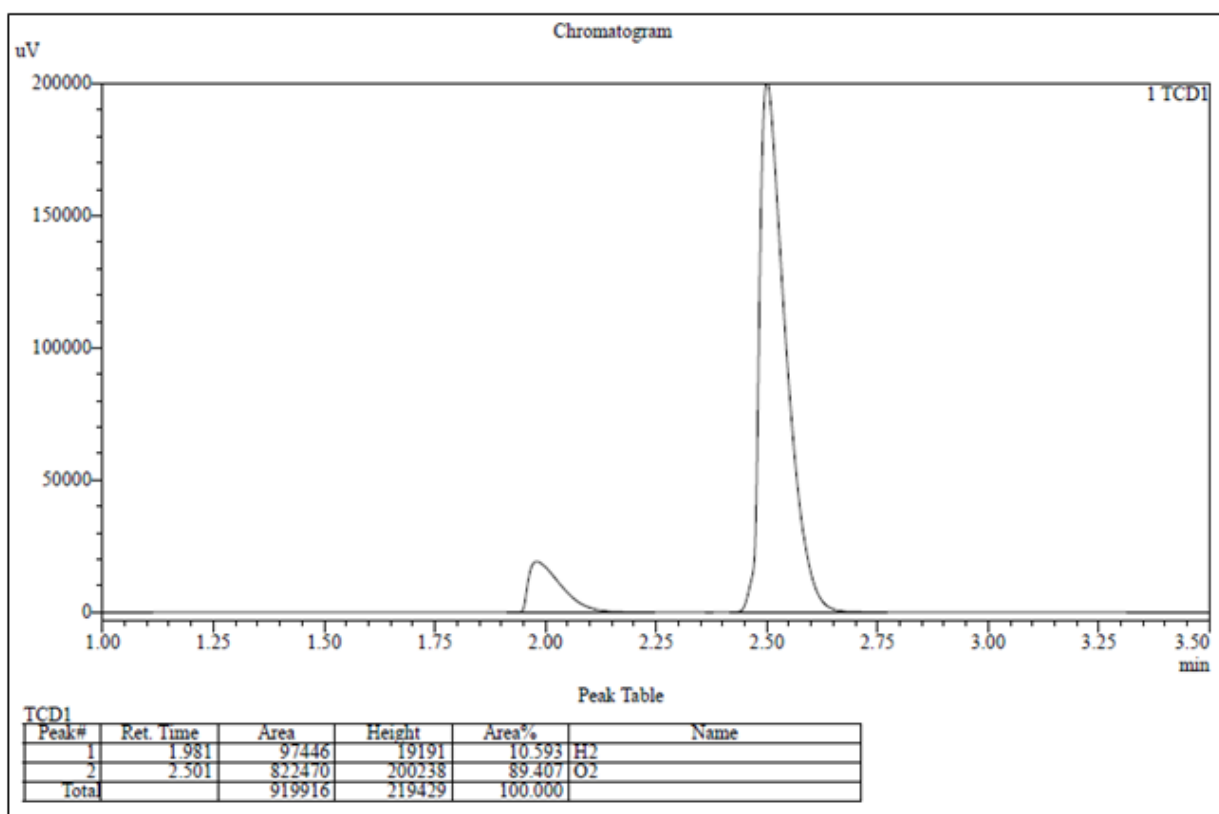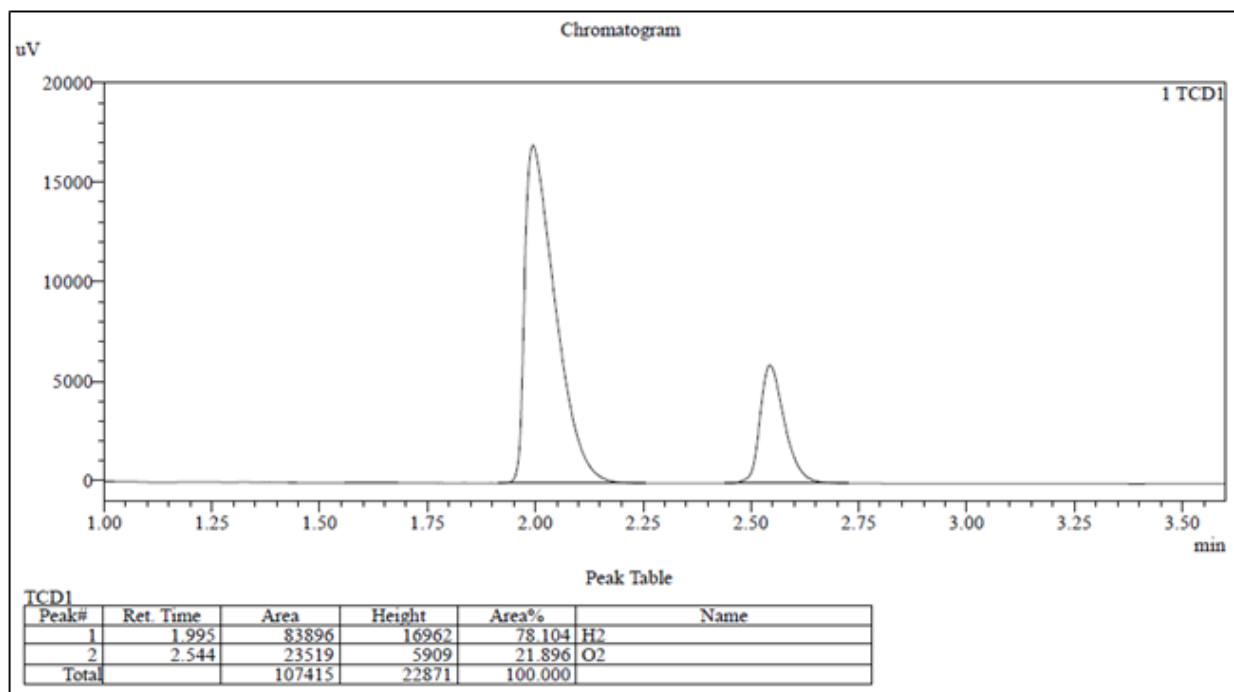

**Fig. S8** Chromatograms of the gas evolved in the reductive electrolysis (top) and hydrogen (bottom). The oxygen peaks are due to contamination by air during sample collection.

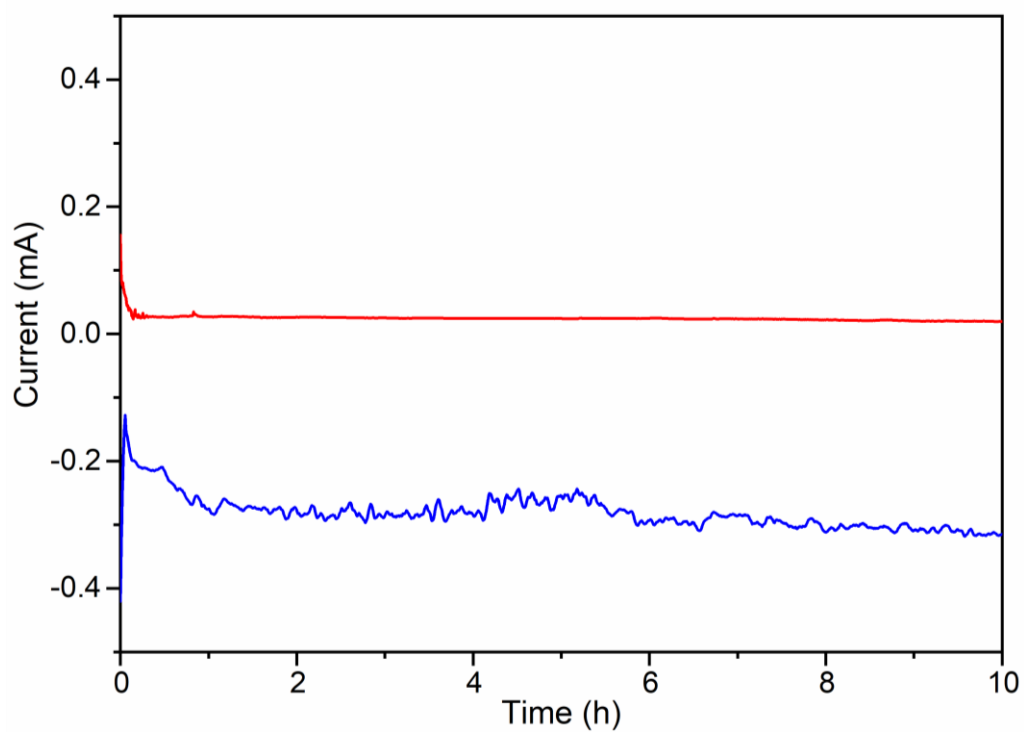

**Fig. S9** Constant potential electrolysis (CPE) plots for OER (—) and HER (---) using the  $[\text{Co}^{\text{II}}\text{Co}^{\text{III}}(\mu\text{-OAc})(\mu_3\text{-OH})(\mu\text{-L})_2]$ , CB, and Nafion mixture coated FTO electrode in 0.1 M sodium phosphate buffer of pH 7.



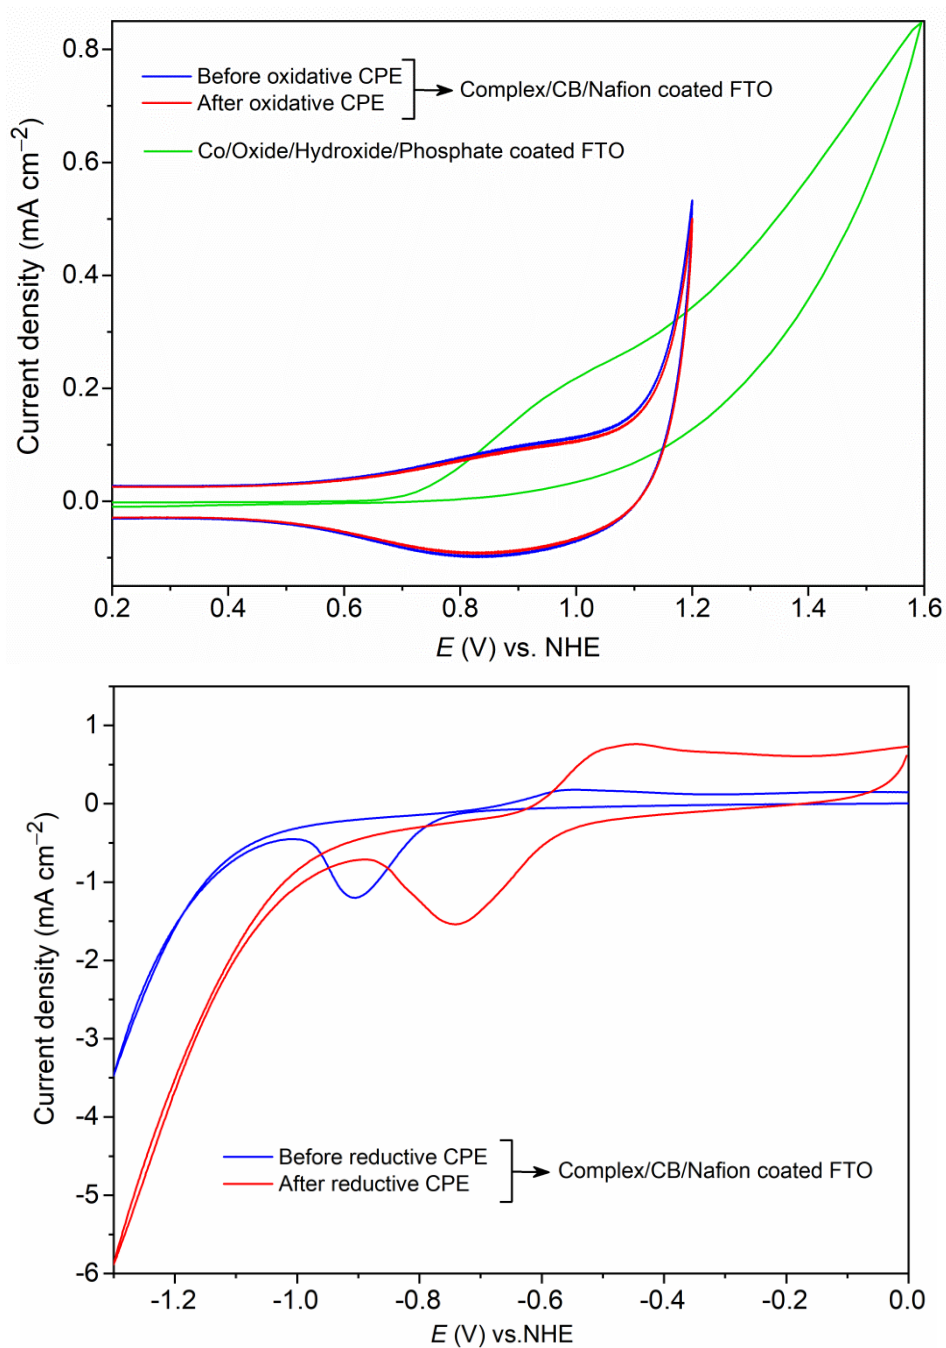

**Fig. S10** CVs using  $[\text{Co}^{\text{II}}\text{Co}^{\text{III}}(\mu\text{-OAc})(\mu_3\text{-OH})(\mu\text{-L})_2]$ , CB, and Nafion mixture coated FTO as working electrode before and after its use in CPE experiments and the CV using cobalt oxide/hydroxide/phosphate coated FTO as working electrode.

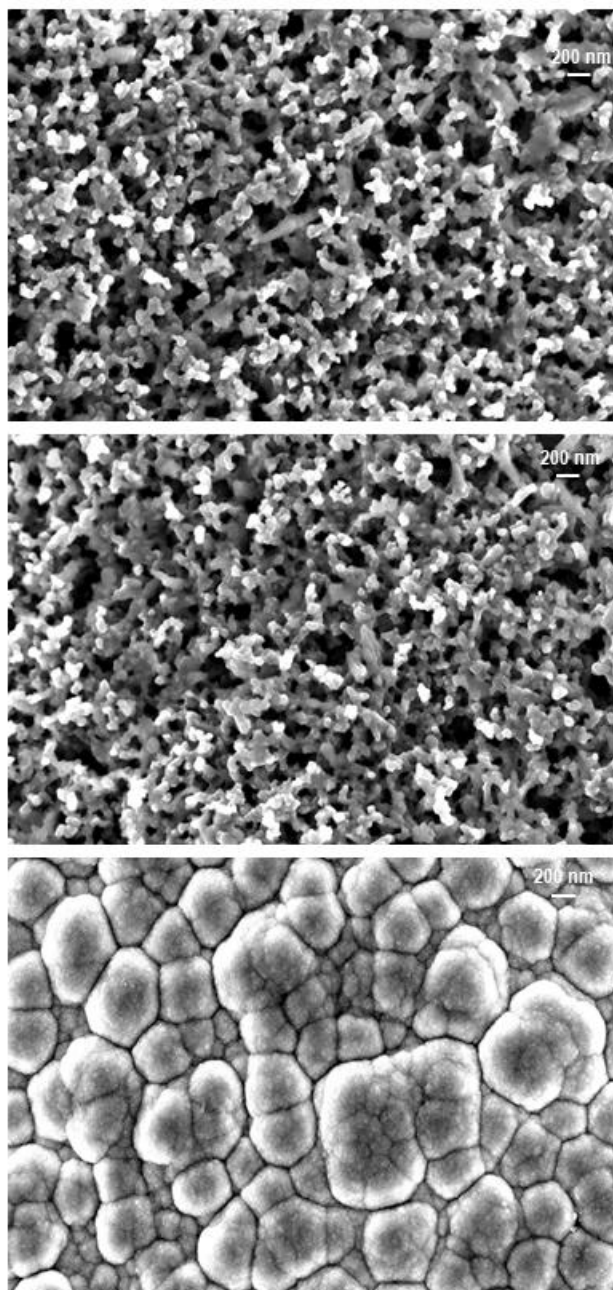

**Fig. S11** FESEM images of FTO electrode coatings: CB/Nafion/complex before (top) and after oxidative (middle) CPE and electrodeposited cobalt oxide/hydroxide/phosphate material (bottom).

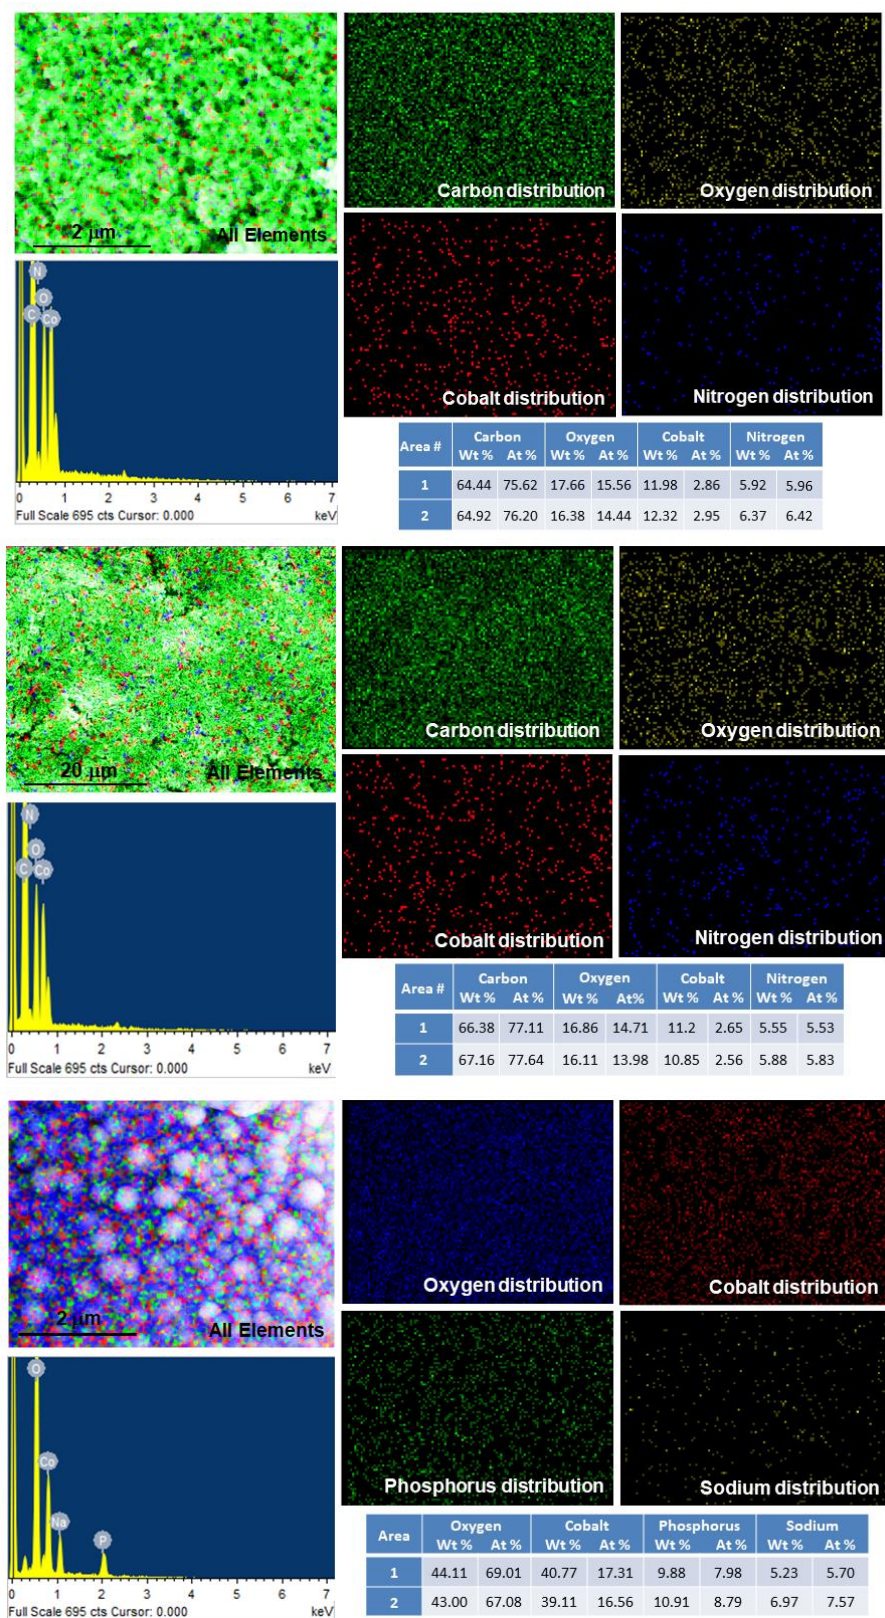

**Fig. S12** EDX spectra and elemental compositions of FTO electrode coatings: complex/CB/Nafion before (top) and after oxidative CPE (middle) and the electrodeposited cobalt oxide/hydroxide/phosphate material (bottom).

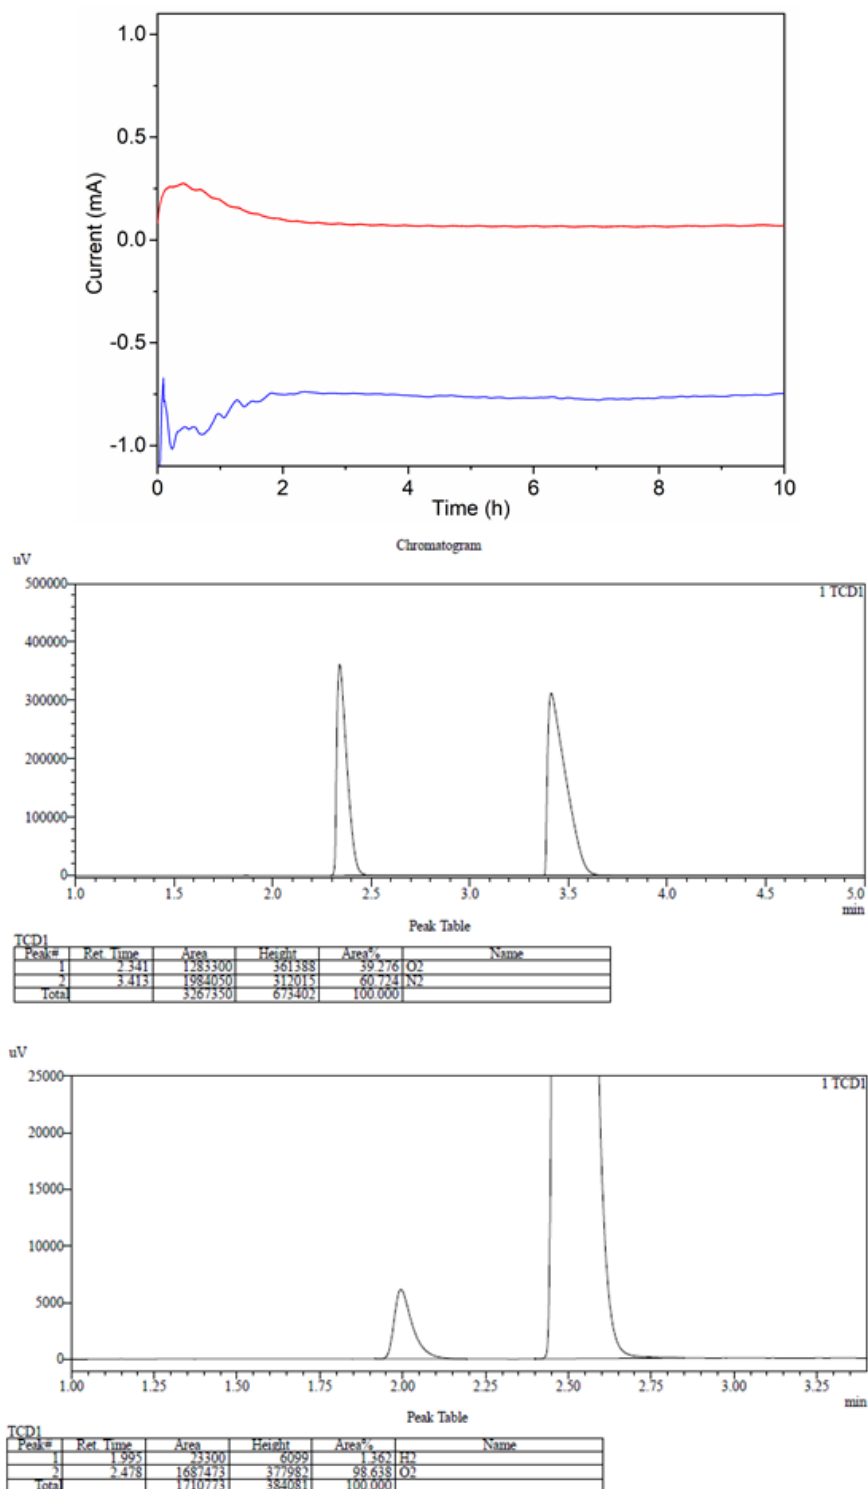

**Fig. S13** Constant potential electrolysis (CPE at 1.28 V for OER and at  $-1.28$  V for HER) plots for OER (—) and HER (---) using  $[\text{Co}^{\text{II}}\text{Co}^{\text{III}}(\mu\text{-OAc})(\mu_3\text{-OH})(\mu\text{-L})_2]$  coated FTO electrode in 0.1 M sodium phosphate buffer of pH 7 (top). Chromatograms of the gases evolved in oxidative CPE (middle) and reductive CPE (bottom). The  $\text{N}_2$  peak in the 1<sup>st</sup> chromatogram and the  $\text{O}_2$  peak in the 2<sup>nd</sup> chromatogram are due to contamination by air during collection of samples.

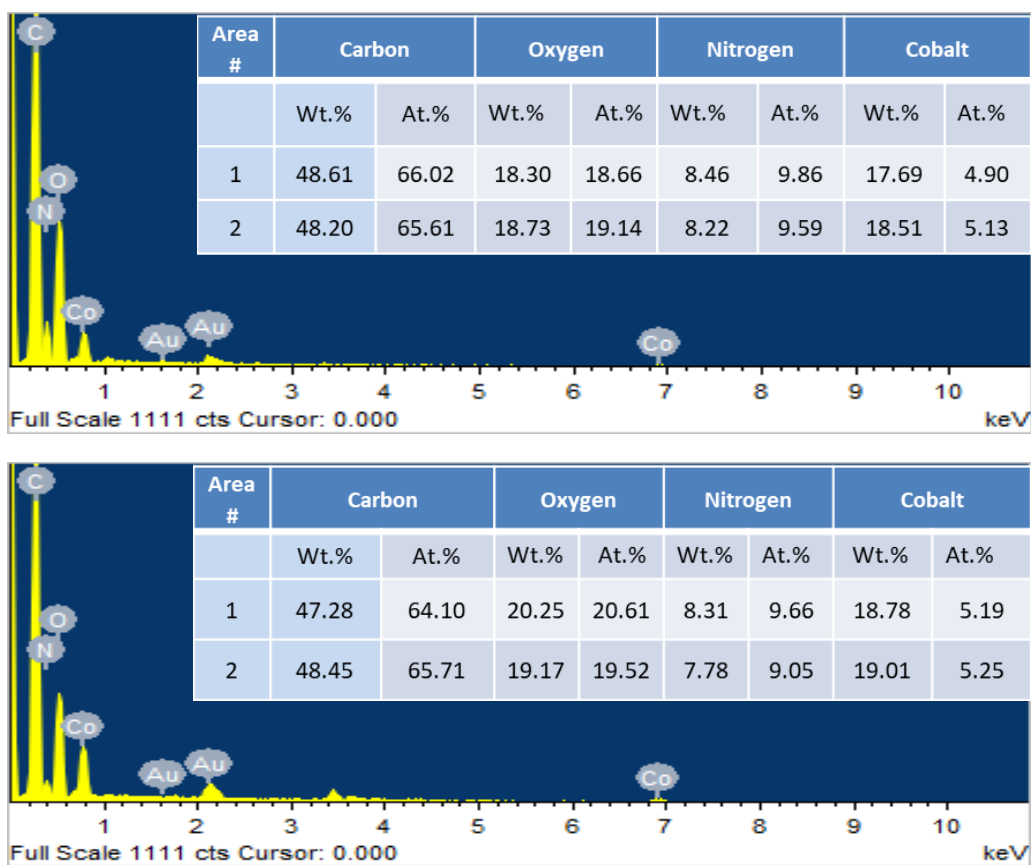

**Fig. S14** EDX spectra and elemental compositions of the pure complex coated FTO electrode surface: before (top) and after oxidative CPE at 1.28 V (bottom).

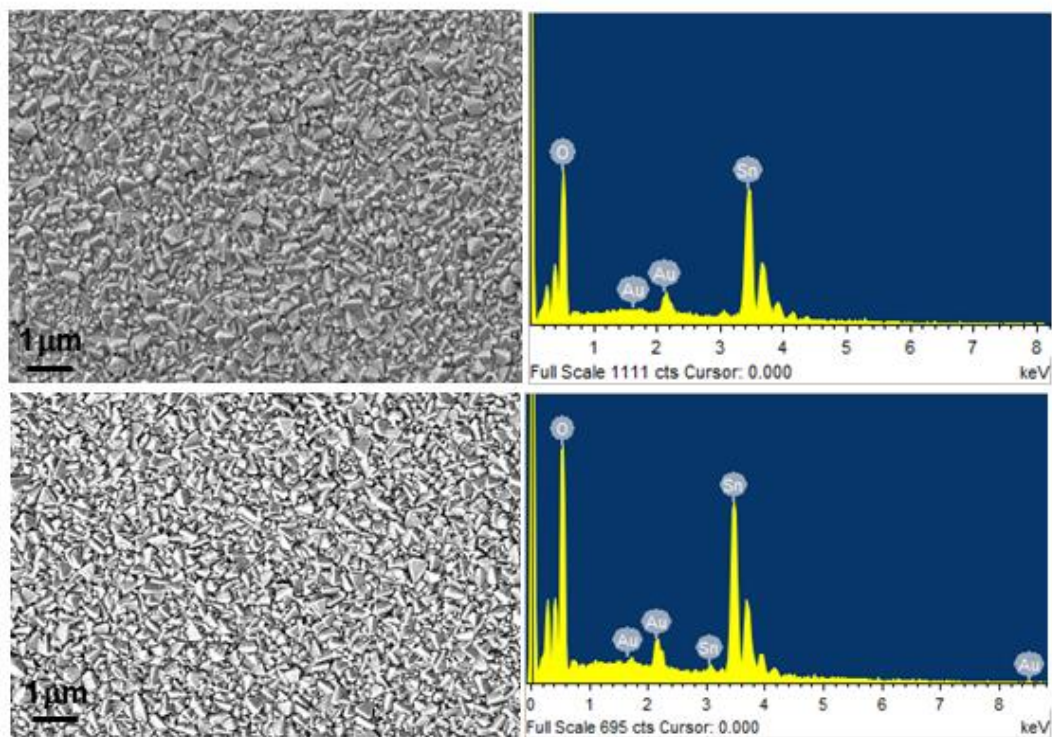

**Fig. S15** FESEM images and EDX spectra of water and DMF washed complex coated FTO electrode used in oxidative CPE at 1.28 V (top) and pristine FTO electrode (bottom).

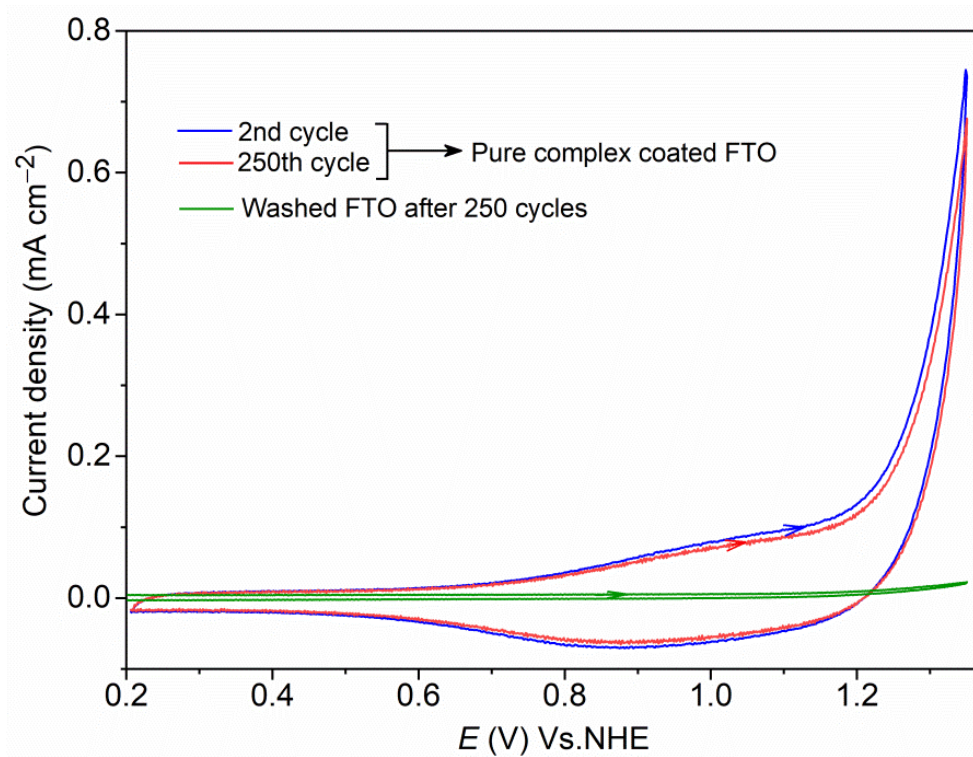

**Fig. S16** CVs using  $[\text{Co}^{\text{II}}\text{Co}^{\text{III}}(\mu\text{-OAc})(\mu_3\text{-OH})(\mu\text{-L})_2]$  coated FTO as working electrode: 2<sup>nd</sup> and 250<sup>th</sup> cycles in 250 consecutive CV cycles and water and DMF washed FTO electrode. All CVs were recorded at a scan rate of  $100 \text{ mV s}^{-1}$ .

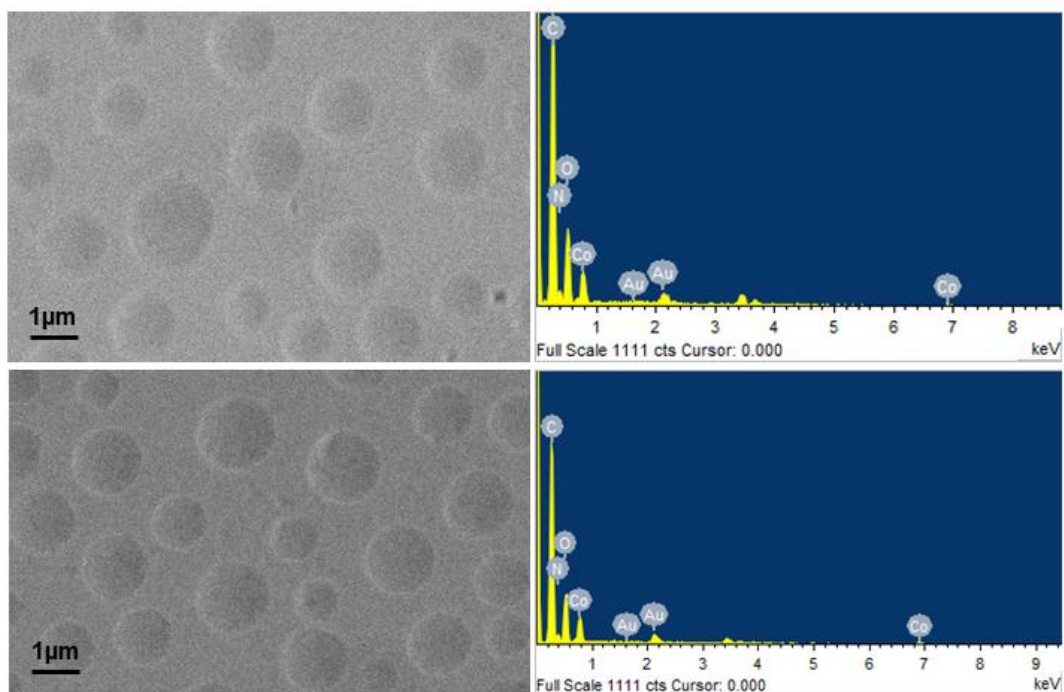

**Fig. S17** FESEM images and EDX spectra of pure complex coated FTO electrode before (top) and after (bottom) its use in 250 consecutive CV cycles.



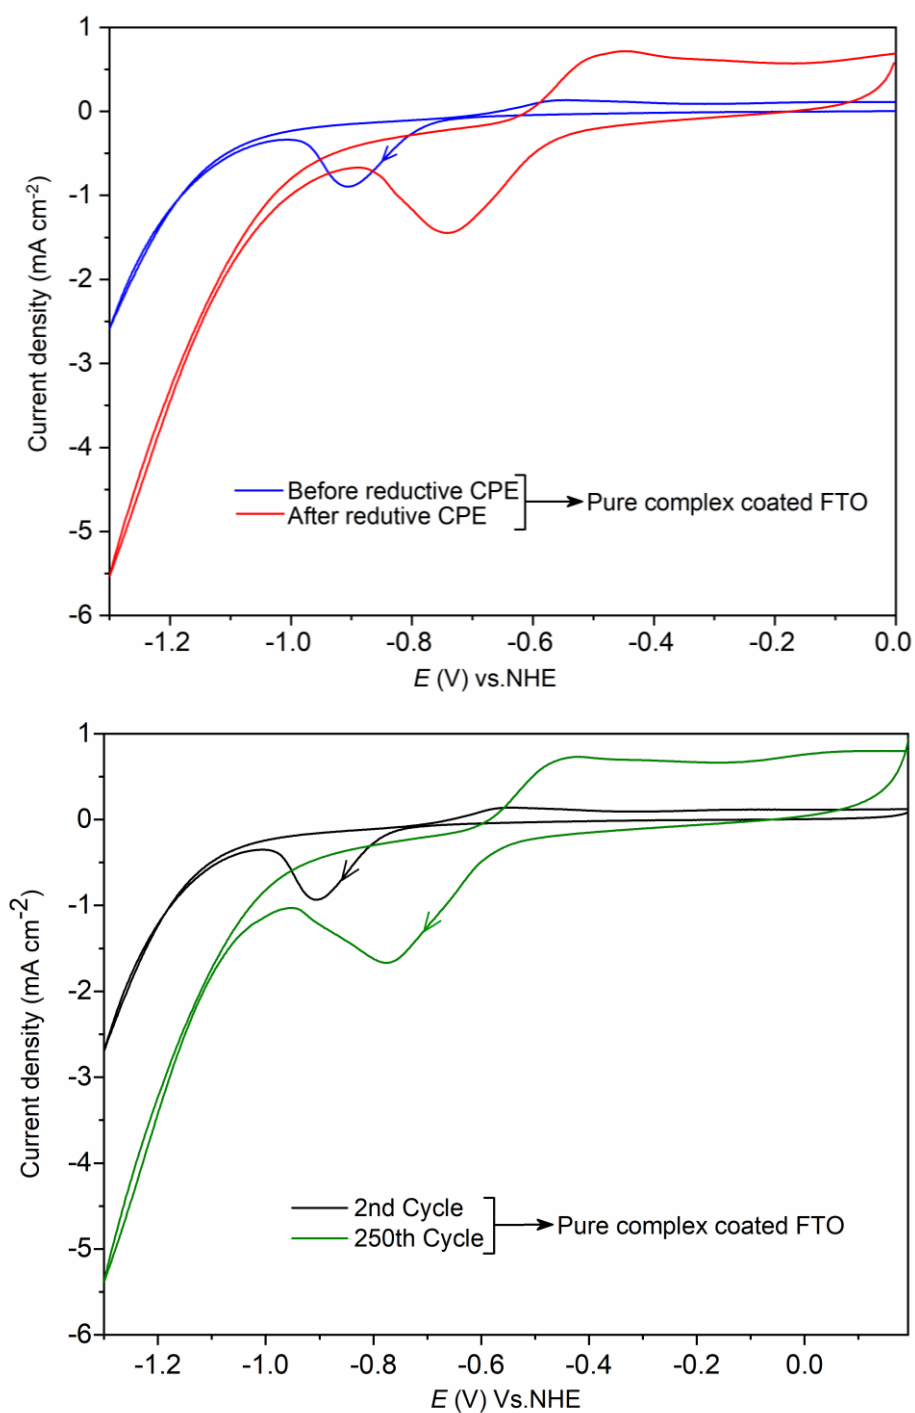

**Fig. S18** CVs using  $[\text{Co}^{\text{II}}\text{Co}^{\text{III}}(\mu\text{-OAc})(\mu_3\text{-OH})(\mu\text{-L})_2]$  coated FTO as working electrode: before and after its use in 10 h reductive CPE (at  $-1.28$  V) (top) and 2<sup>nd</sup> and 250<sup>th</sup> cycles in 250 consecutive CV cycles (bottom). All CVs were recorded at a scan rate of  $100$   $\text{mV s}^{-1}$ .

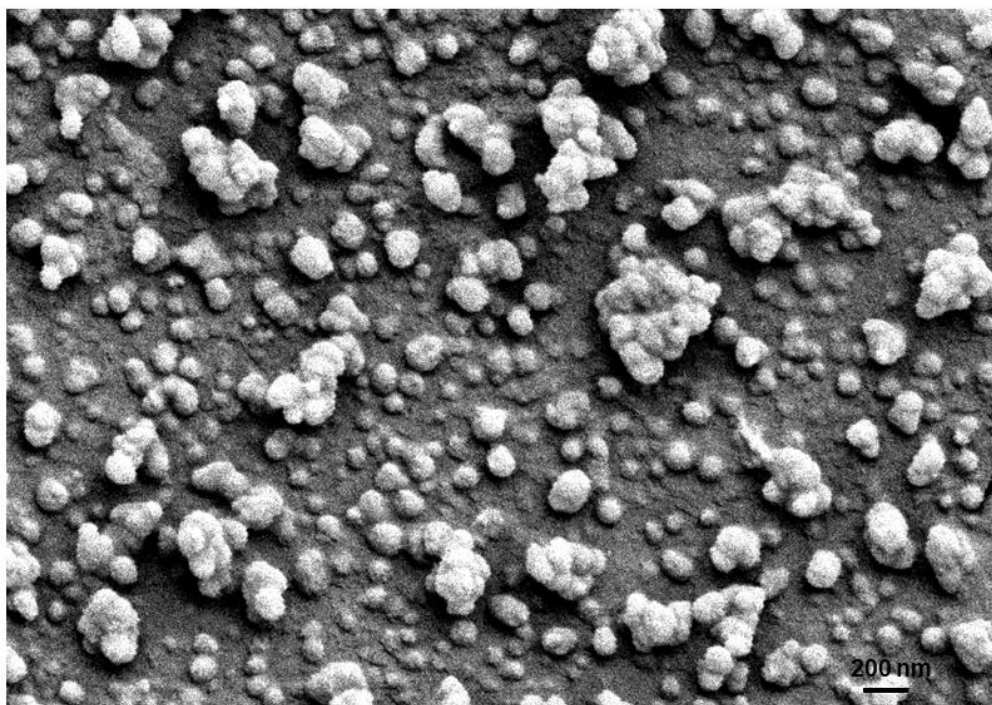

**Fig. S19** FESEM image of  $[\text{Co}^{\text{II}}\text{Co}^{\text{III}}(\mu\text{-OAc})(\mu_3\text{-OH})(\mu\text{-L})_2]_2$  coated FTO electrode after its use in 10 h reductive CPE (at  $-1.28$  V) and followed by washing with water.
